# Supplementary material for: Platinum(ii)–chloroquine complexes are antimalarial agents against blood and liver stages by impairing mitochondrial function
Source: Royal Society of Chemistry journal article supplement (doi:10.1039/c7mt00196g), 2017-01-01
Supplement: c7mt00196g1.pdf [file c7mt00196g1.pdf]

## Electronic Supplementary Information

### Platinum(II)-chloroquine complexes are antimalarial agents against blood and liver stages by impairing mitochondrial function

Taís S. Macedo,<sup>a‡</sup> Wilmer Villarreal,<sup>b‡</sup> Camila C. Couto,<sup>a</sup> Diogo R. M. Moreira,<sup>a</sup> Maribel Navarro,<sup>c</sup> Marta Machado,<sup>d</sup> Miguel Prudêncio,<sup>d</sup> Alzir A. Batista,<sup>b</sup> Milena B. P. Soares<sup>a,e\*</sup>

<sup>a</sup>FIOCRUZ, Instituto Gonçalo Moniz, 40296-710, Salvador, BA, Brazil.

<sup>b</sup>UFSCAR, Departamento de Química, 13565-905, São Carlos, SP, Brazil.

<sup>c</sup>UFJF, ICE, Departamento de Química, 36036-900, Juiz de Fora, MG, Brazil.

<sup>d</sup>Instituto de Medicina Molecular, Faculdade de Medicina, Universidade de Lisboa, 1649-028 Lisboa, Portugal.

<sup>e</sup>Centro de Biotecnologia e Terapia Celular, Hospital São Rafael, 41253-190, Salvador, BA, Brazil.

---

\*Corresponding author: FIOCRUZ, Instituto Gonçalo Moniz, CEP 40296-710, Salvador, BA, Brazil.

(+55)71-31762292; email: milena@bahia.fiocruz.br

‡Footnote: Taís S. Macedo and Wilmer Villarreal share first authorship.

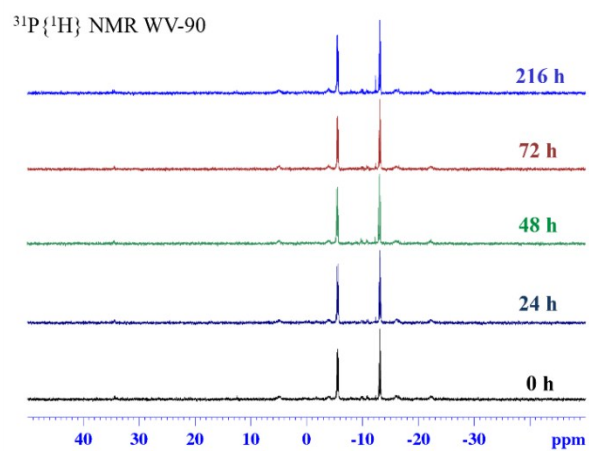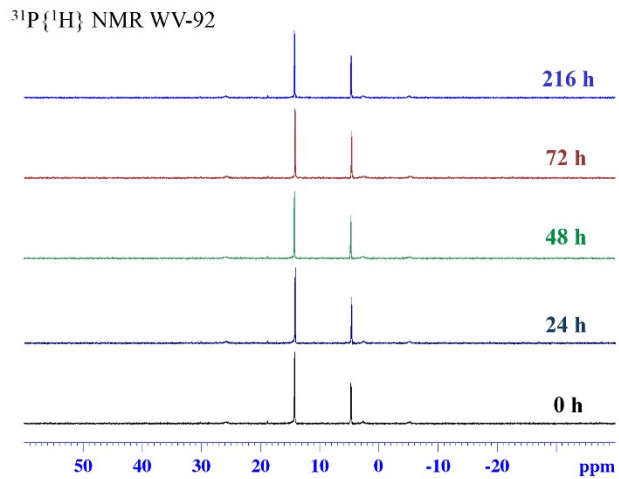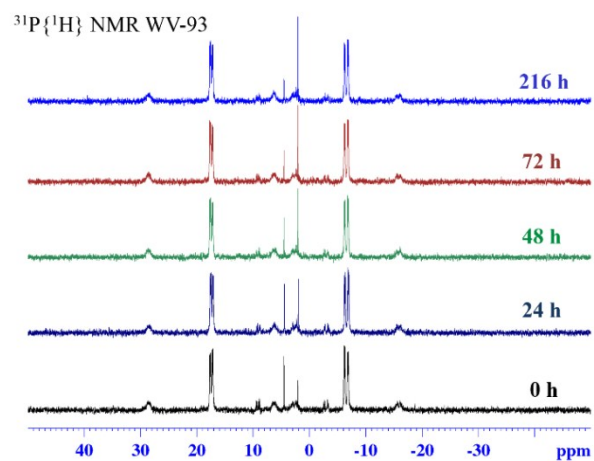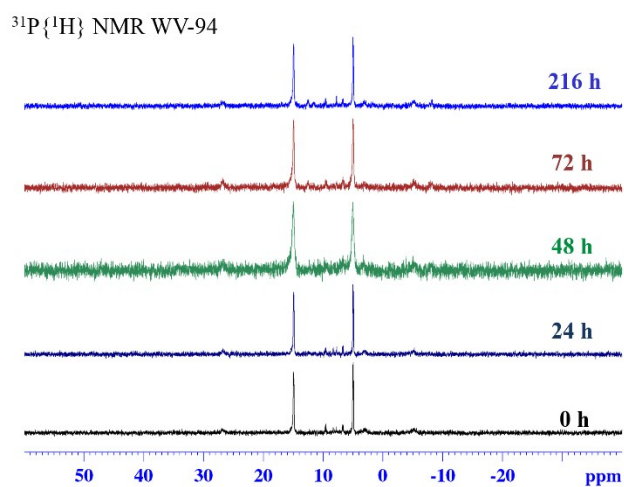

**Figure S1:**  $^{31}\text{P}\{^1\text{H}\}$  spectra of platinum complexes in a mixture DMSO:Trizma 60:40 ( $\text{D}_2\text{O}$ ). Incubation times are indicated in the right axis of each spectrum.

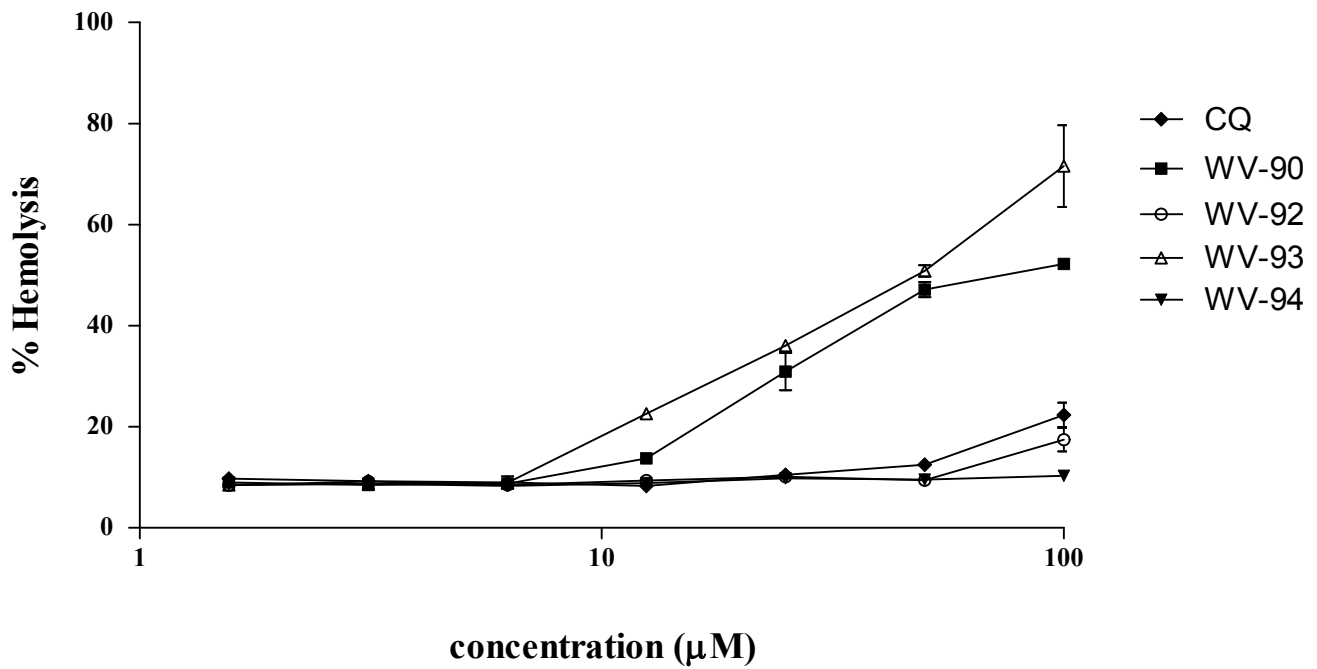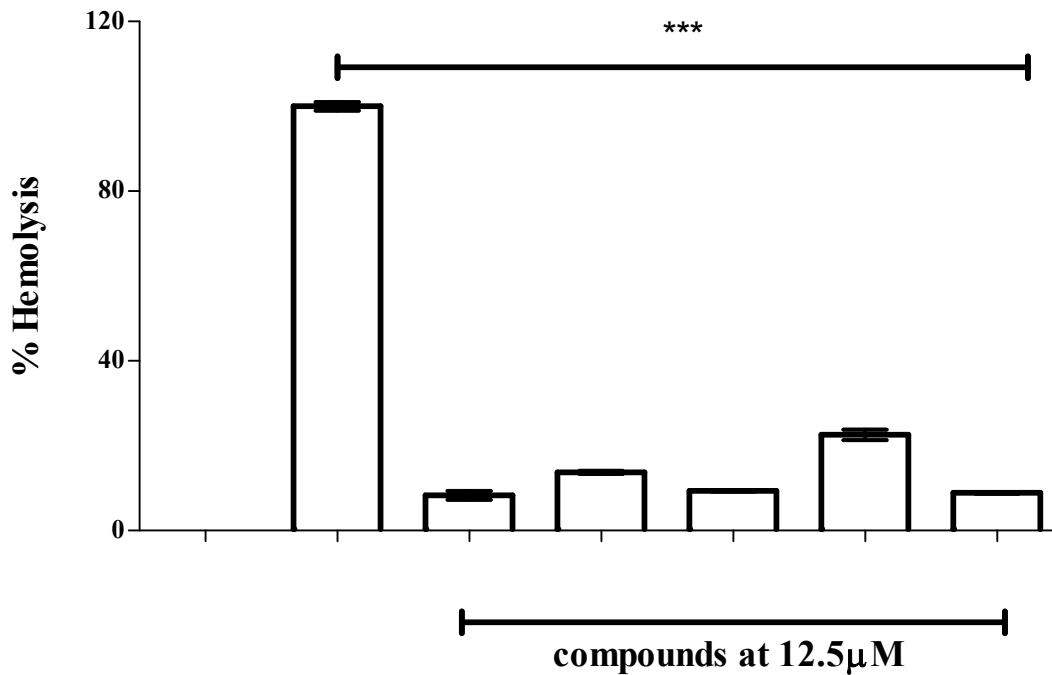

**Figure S2:** Hemolysis in uninfected erythrocytes after 1 h incubation of compounds at indicated concentration. DMSO at 0.5 % (v/v) in PBS, Saponin at 1 % v/v in PBS. Two independent experiments were performed. Error bars represent S.D. from pooling triplicate values of one experiment. \*\*\*  $p < 0.01$  (one-way ANOVA and Newman-Keuls test).

**Table S1:** Cytostatic activity of platinum complexes against intraerythrocytic *P. falciparum*.

| Comp.        | <i>P. falciparum</i> , IC <sub>50</sub> ±S.D.(μM) <sup>a</sup> |                 |
|--------------|----------------------------------------------------------------|-----------------|
|              | CQ-sensitive 3D7                                               | CQ-resistant W2 |
| <b>WV-48</b> | > 5.0                                                          | 3.6±0.3         |
| <b>WV-31</b> | > 5.0                                                          | N.D.            |
| <b>WV-51</b> | >5.0                                                           | N.D.            |
| <b>WV-50</b> | 3.9±0.5                                                        | 2.4±0.3         |

<sup>a</sup>Determined 72 h after incubation with compounds.

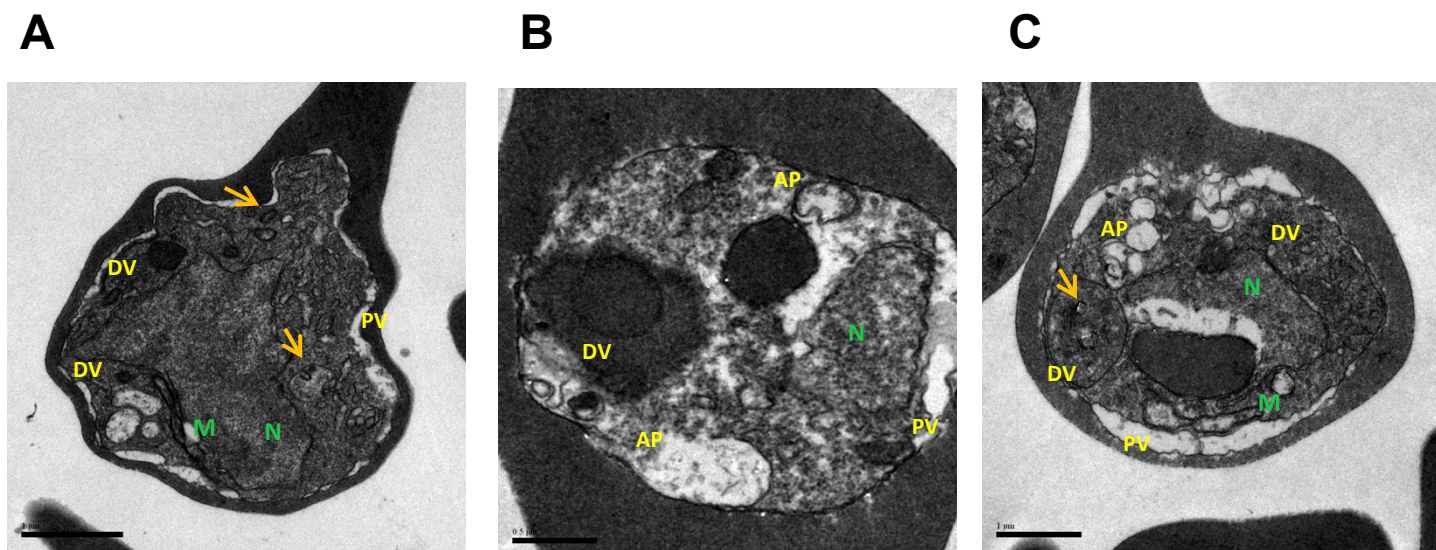

**Figure S3:** Ultrastructural effects of platinum complex and chloroquine in *P. berghei*-infected mice. Representative transmission electron micrographs of untreated (panel A), chloroquine at 66  $\mu\text{mol/kg}$  (panel B) and WV-90 at 66  $\mu\text{mol/kg}$  (panel C) after 6 h treatment. *Abbreviation:* N, nucleus, M, mitochondria; DV, digestive vacuole, AP, autophagosome; MP, parasitophorous vacuole. Arrows indicate hemozoin.
